# Supplementary material for: Alternation of heterotrophic bacterial and archaeal production along nitrogen and salinity gradients in coastal wetlands
Source: Copernicus journal article supplement (doi:10.5194/bg-2020-60), 2020-04-03
Supplement: Supplementary file 1 [file bg-2020-60-supplement.pdf]

Table S1. Raw data of physicochemical and microbial variables: Temperature (Tem, °C), salinity (salin., ppt), Total Dissolved Nitrogen (TDN, mmol-N L<sup>-1</sup>), Total Dissolved Phosphorus (TDP, μmol-P L<sup>-1</sup>), Dissolved Organic Carbon (DOC, mmol-C l<sup>-1</sup>), chlorophyll *a* (Chl *a*, μg/L), Prokaryotic heterotrophic abundance (HA, cells mL<sup>-1</sup>), cyanobacteria abundance (CA, cells mL<sup>-1</sup>), Bacterial production (BP, pmoles of leucine L<sup>-1</sup>h<sup>-1</sup>), Archaeal Production (ArP, pmoles of leucine L<sup>-1</sup>h<sup>-1</sup>) and Virus abundance (VA, particles mL<sup>-1</sup>) for each ponds in the study wetlands.

| Odiel Marshes<br>(OdielM)<br>Huelva, Spain | Sampling<br>Date<br>(dd/mm/yy) | Tem  | Salin. | TN   | TDN  | TP    | TDP   | DOC  | Chl <i>a</i> | HA<br>(x10 <sup>6</sup> ) | CA<br>(x10 <sup>3</sup> ) | BP      | ArP    | VA<br>(x10 <sup>9</sup> ) |
|--------------------------------------------|--------------------------------|------|--------|------|------|-------|-------|------|--------------|---------------------------|---------------------------|---------|--------|---------------------------|
| E1<br>37°13'08.3"N<br>06°59'56.7"W         | 28/05/12                       | 24.7 | 23.15  | n.d. | 0.05 | 7.16  | 3.66  | 0.36 | n.d.         | 8.29                      | 103.99                    | 1165.86 | 235.57 | 0.17                      |
| E2<br>37°12'40.8"N<br>06°59'43.1"W         | 29/05/12                       | 21.0 | 39.27  | 0.10 | 0.02 | 6.26  | 3.12  | 0.60 | 18.21        | 6.37                      | 1599.42                   | 476.79  | 336.36 | 0.29                      |
| E3<br>37°12'40.8"N<br>06°59'43.1"W         | 29/05/12                       | 21.2 | 37.07  | 0.31 | 0.05 | 12.36 | 7.88  | 0.87 | 25.79        | 8.88                      | 2719.25                   | 888.20  | 439.43 | 0.48                      |
| E4<br>37°13'31.2"N<br>06°59'46.1"W         | 29/05/12                       | 20.8 | 61.62  | 0.31 | 0.12 | 20.07 | 13.62 | 1.68 | 108.99       | 32.58                     | 11968.78                  | 285.08  | 329.40 | 0.60                      |
| E5<br>37°13'46.6"N<br>07°00'48.5"W         | 28/05/12                       | 23.1 | 27.84  | n.d. | 0.03 | 7.16  | 4.20  | 0.38 | n.d.         | 8.42                      | 135.50                    | 713.94  | 266.62 | 0.18                      |
| E6<br>37°13'46.6"N<br>07°00'48.5"W         | 28/05/12                       | 25.4 | 61.15  | 0.14 | 0.11 | 12.72 | 12.00 | 1.19 | 24.34        | 2.24                      | 2508.49                   | 463.24  | 506.13 | 0.50                      |
| E7<br>37°13'46.5"N<br>07°00'48.5"W         | 28/05/12                       | 24.9 | 64.57  | 0.17 | 0.10 | 17.56 | 12.18 | 1.28 | 14.03        | 19.70                     | 1456.49                   | 468.01  | 922.51 | 0.60                      |

|                                     |          |      |            |      |      |       |       |      |       |        |         |        |         |      |
|-------------------------------------|----------|------|------------|------|------|-------|-------|------|-------|--------|---------|--------|---------|------|
| E8<br>37°13'46.5"N<br>07°00'48.5"W  | 28/05/12 | 22.2 | 80.46      | 0.21 | 0.14 | 39.45 | 27.97 | 1.61 | 39.25 | 0.35   | 4103.46 | 824.58 | 916.08  | 0.50 |
| E9<br>37°14'07.3"N<br>07°00'13.8"W  | 29/05/12 | 22.1 | 75.56      | 0.79 | 0.23 | 25.45 | 17.56 | 1.64 | 79.28 | 26.45  | 6354.18 | n.d.   | 1888.60 | 0.64 |
| E10<br>37°15'11.9"N<br>06°59'45.0"W | 30/05/12 | 20.1 | 83.30      | 0.56 | 0.16 | 25.19 | 20.79 | 2.00 | 35.49 | 17.61  | 1423.58 | 276.40 | 959.76  | 0.54 |
| E11<br>37°15'24.5"N<br>06°59'31.6"W | 30/05/12 | 20.4 | 97.72      | 0.75 | 0.20 | 34.33 | 24.11 | 2.10 | 36.20 | 0.00   | 3862.42 | 495.36 | 556.67  | 0.64 |
| E12<br>37°14'42.5"N<br>06°59'33.4"W | 30/05/12 | 21.1 | 106.9<br>8 | 0.44 | 0.37 | 41.06 | 22.76 | 2.29 | 39.25 | 0.00   | 5975.27 | 115.67 | 1860.65 | 0.61 |
| E13<br>37°14'07.4"N<br>07°00'13.9"W | 29/05/12 | 21.9 | 127.2<br>4 | 0.37 | 0.32 | 45.37 | 27.25 | 2.85 | 4.95  | 0.00   | 615.58  | 379.84 | 1106.08 | 1.32 |
| E14<br>37°14'22.7"N<br>06°59'49.3"W | 29/05/12 | 24.4 | n.d.       | 0.51 | n.d. | 27.79 | 24.38 | 3.51 | 2.22  | 0.00   | n.d.    | 636.43 | 2173.49 | 1.81 |
| E15<br>37°15'21.7"N<br>06°59'19.6"W | 30/05/12 | 23.3 | 158.4<br>4 | 1.22 | 0.43 | 48.60 | 34.42 | 2.20 | 37.85 | 29.72  | 3650.70 | 341.11 | 856.78  | 0.45 |
| E16<br>37°14'42.5"N<br>06°59'33.4"W | 30/05/12 | 20.6 | 97.64      | 1.04 | 0.50 | 32.27 | 23.97 | 2.63 | 18.59 | 47.89  | 2109.00 | 396.14 | 910.86  | 1.02 |
| E17<br>37°14'42.5"N<br>06°59'33.4"W | 29/05/12 | 23.5 | 126.6<br>8 | 0.56 | 0.29 | 23.03 | 21.15 | 3.11 | 22.23 | 90.88  | 2832.28 | 346.54 | 904.76  | 1.66 |
| E18<br>37°14'09.8"N<br>06°59'41.8"W | 29/05/12 | 22.7 | 181.4<br>8 | 1.02 | 0.35 | n.d.  | 48.06 | 3.78 | 18.63 | 130.68 | 1134.79 | 388.52 | 946.67  | 2.10 |
| E19<br>37°14'07.2"N<br>07°00'13.8"W | 29/05/12 | 21.7 | 197.8<br>0 | 0.59 | 0.34 | 26.08 | 20.97 | 3.30 | 6.00  | 125.56 | 293.95  | 725.69 | 1112.40 | 3.07 |

| Veta la Palma,<br>Doñana (VPalma)<br>Sevilla, Spain | Sampling<br>Date | Temp | Salin. | TN   | TDN  | TP    | TDP   | DOC  | Chl a | HA<br>(x10 <sup>6</sup> ) | CA<br>(x10 <sup>3</sup> ) | BP      | ArP     | VA<br>(x10 <sup>9</sup> ) |
|-----------------------------------------------------|------------------|------|--------|------|------|-------|-------|------|-------|---------------------------|---------------------------|---------|---------|---------------------------|
| G3<br>36°58'29.8"N<br>06°14'01.2"W                  | 26/06/12         | 33.5 | 34.29  | 0.59 | 0.24 | 9.04  | 2.88  | 2.45 | n.d.  | 47.42                     | 51.20                     | 1346.34 | 1003.16 | 0.82                      |
| G4<br>36°58'28.9"N<br>06°13'55.1"W                  | 26/06/12         | 29.3 | 30.90  | 0.53 | 0.26 | 9.81  | 2.53  | 2.49 | n.d.  | 83.24                     | 2126.28                   | 615.37  | 617.96  | 0.99                      |
| A7<br>36°54'39.0"N<br>06°15'15.8"W                  | 26/06/12         | 31   | 33.73  | 0.56 | 0.24 | 17.81 | 12.27 | 3.11 | n.d.  | 65.91                     | 1314.23                   | 656.83  | 1378.58 | 1.14                      |
| B6<br>36°55'33.3"N<br>06°14'43.2"W                  | 26/06/12         | 31.2 | 14.42  | 0.38 | 0.26 | n.d   | 11.30 | 0.74 | n.d.  | 28.75                     | 1480.18                   | 1234.22 | 1474.39 | 0.36                      |
| B3<br>36°56'41.6"N<br>06°14'39.0"W                  | 27/06/12         | 27   | 17.05  | 0.42 | 0.27 | 4.20  | 1.48  | 0.77 | n.d.  | 0.00                      | 2309.43                   | 917.73  | 1193.58 | 0.26                      |
| D6<br>36°55'34.2"N<br>06°13'37.7"W                  | 27/06/12         | 29.4 | 22.55  | 0.22 | 0.18 | 8.43  | 1.70  | 1.17 | n.d.  | 0.00                      | 175.35                    | 2018.31 | 712.51  | 0.47                      |
| C2<br>36°57'20.3"N<br>06°13'57.0"W                  | 27/06/12         | 29   | 22.57  | 0.35 | 0.09 | 4.35  | 0.61  | 1.11 | n.d.  | 25.12                     | 1801.25                   | 1046.37 | 1001.69 | 0.27                      |
| C3<br>36°56'40.1"N<br>06°13'30.3"W                  | 27/06/12         | 29.2 | 17.79  | 0.42 | 0.10 | 4.74  | 0.51  | 0.74 | n.d.  | 13.44                     | 3965.91                   | 961.33  | 932.40  | 0.20                      |
| C6<br>36°55'28.5"N<br>06°14'11.1"W                  | 27/06/12         | 30.8 | 21.14  | 0.41 | 0.21 | 7.27  | 3.27  | 0.99 | n.d.  | 26.00                     | 960.64                    | 1014.36 | 1385.32 | 0.30                      |
| A1<br>36°58'02.9"N<br>06°14'31.9"W                  | 27/06/12         | 31.8 | 25.27  | 0.49 | 0.25 | 6.58  | 1.20  | n.d. | n.d.  | 24.68                     | 1273.53                   | 1076.62 | 980.81  | 0.63                      |
| Cabo de Gata<br>(CGata)<br>Almeria, Spain           | Sampling<br>Date | Temp | Salin. | TN   | TDN  | TP    | TDP   | DOC  | Chl a | HA<br>(x10 <sup>6</sup> ) | CA<br>(x10 <sup>3</sup> ) | BP      | ArP     | VA<br>(x10 <sup>9</sup> ) |

|                                          |                  |      |            |      |      |      |      |      |        |                           |                           |         |         |                           |
|------------------------------------------|------------------|------|------------|------|------|------|------|------|--------|---------------------------|---------------------------|---------|---------|---------------------------|
| 1<br>36°46'05.6"N<br>02°13'36.7"W        | 04/07/12         | 27.2 | 36.08      | n.d  | 0.18 | n.d. | 0.51 | 0.24 | 0.26   | 8.78                      | 4.01                      | 1960.29 | 327.38  | 0.04                      |
| 2<br>36°46'02.3"N<br>02°13'38.6"W        | 04/07/12         | 24.9 | 51.8       | 0.23 | 0.18 | 1.58 | 1.05 | 0.38 | n.d.   | 8.05                      | 9.51                      | 2185.20 | 866.06  | 0.09                      |
| 3<br>36°45'40.4"N<br>02°13'01.3"W        | 04/07/12         | 25.4 | 65.46      | n.d. | 0.31 | 3.55 | 1.35 | 0.87 | n.d.   | 8.75                      | 7.58                      | 2347.09 | 468.45  | 0.09                      |
| 4<br>36°45'40.4"N<br>02°13'01.2"W        | 04/07/12         | 25.9 | 73.02      | 0.23 | 0.13 | 2.04 | 0.97 | 0.44 | n.d.   | 6.74                      | 10.58                     | 2438.50 | 634.15  | 0.07                      |
| 5<br>36°45'17.7"N<br>02°12'51.9"W        | 04/07/12         | 27.6 | 92.76      | 0.34 | 0.25 | 1.74 | 0.58 | 0.55 | n.d.   | 9.51                      | 5.10                      | 1554.77 | 1084.31 | 0.09                      |
| 6<br>36°45'17.7"N<br>02°12'51.9"W        | 04/07/12         | 26.3 | 115.6<br>6 | n.d. | 0.18 | 1.20 | 2.28 | 0.65 | n.d.   | 2.26                      | 1.33                      | 1554.77 | 1012.07 | 0.12                      |
| El Hondo<br>(Hondo)<br>Alicante, Spain   | Sampling<br>Date | Temp | Salin.     | TN   | TDN  | TP   | TDP  | DOC  | Chl a  | HA<br>(x10 <sup>6</sup> ) | CA<br>(x10 <sup>6</sup> ) | BP      | ArP     | AV<br>(x10 <sup>9</sup> ) |
| Laguna35<br>38°11'25.1"N<br>00°45'00.7"W | 12/06/12         | 24.7 | 14.33      | 0.45 | 0.19 | 2.37 | 2.05 | 2.07 | 26.95  | n.d.                      | n.d.                      | 612.22  | 1092.28 | 0.40                      |
| Reserva<br>38°11'25.2"N<br>00°45'00.7"W  | 12/06/12         | 26.3 | 15.15      | 0.81 | 0.23 | 1.40 | 1.31 | 1.99 | 28.68  | n.d.                      | n.d.                      | 913.68  | 1179.17 | 0.37                      |
| Levante<br>38°11'25.1"N<br>00°45'00.7"W  | 12/06/12         | 26.9 | 4.3        | 0.45 | 0.16 | 6.76 | 3.40 | 1.40 | 149.63 | n.d.                      | n.d.                      | 735.01  | 1499.63 | 0.86                      |
| Poniente<br>38°10'15.3"N<br>00°44'25.9"W | 12/06/12         | 24.6 | 14.49      | 0.90 | 0.29 | 9.73 | 8.96 | 3.05 | 67.54  | n.d.                      | n.d.                      | 1268.27 | 460.93  | 1.10                      |
| Norte<br>38°11'22.1"N<br>00°45'09.6"W    | 12/06/12         | 24.2 | 15.83      | 0.27 | 0.15 | 2.55 | 2.50 | 1.53 | 17.86  | n.d.                      | n.d.                      | 948.05  | 382.72  | 0.35                      |

|                                              |                  |      |            |      |      |       |      |      |        |                           |                           |         |         |                           |
|----------------------------------------------|------------------|------|------------|------|------|-------|------|------|--------|---------------------------|---------------------------|---------|---------|---------------------------|
| Claudio<br>38°12'12.5"N<br>00°46'01.8"W      | 12/06/12         | 28.9 | 18.03      | 0.47 | 0.29 | n.d   | 3.85 | 3.26 | 10.33  | n.d.                      | n.d.                      | 1292.39 | 316.25  | 0.36                      |
| Balserones<br>38°11'41.2"N<br>00°46'46.8"W   | 12/06/12         | 30.6 | 22.03      | 0.48 | 0.21 | 3.98  | 3.85 | 2.31 | 7.30   | n.d.                      | n.d.                      | 1515.10 | 1263.47 | 0.60                      |
| Santa Pola<br>(SPola)<br>Alicante, Spain     | Sampling<br>Date | Temp | Salin.     | TN   | TDN  | TP    | TDP  | DOC  | Chl a  | HA<br>(x10 <sup>6</sup> ) | CA<br>(x10 <sup>3</sup> ) | BP      | ArP     | VA<br>(x10 <sup>9</sup> ) |
| Calderones 1<br>38°11'48.1"N<br>00°36'04.9"W | 13/06/12         | 22.7 | 69.52      | n.d. | 0.08 | 4.50  | 1.37 | 1.09 | 10.24  | 27.43                     | 190.08                    | 2409.02 | 990.15  | 0.10                      |
| Seca 1<br>38°11'53.1"N<br>00°36'13.1"W       | 13/06/12         | 22   | 71.5       | n.d. | 0.10 | 1.37  | 1.00 | 0.89 | 10.79  | 7.35                      | 208.72                    | 2003.72 | 1473.45 | 0.12                      |
| Seca 2<br>38°12'01.0"N<br>00°36'19.6"W       | 13/06/12         | 25.3 | 85.62      | 0.14 | 0.10 | 5.86  | 5.24 | 0.92 | 21.98  | 27.86                     | 208.10                    | 2720.63 | 1297.21 | 0.13                      |
| Teniente<br>38°11'51.8"N<br>00°36'01.9"W     | 13/06/12         | 23.6 | 63.06      | 0.14 | 0.13 | 4.08  | 3.12 | 1.08 | 20.04  | 2.86                      | 145.74                    | 2828.60 | 1213.08 | 0.10                      |
| Charco-Lis<br>38°10'59.0"N<br>00°37'06.5"W   | 13/06/12         | 26.4 | 35.06      | n.d. | 0.08 | 5.06  | 2.66 | 0.51 | 1.59   | 252.35                    | 1.44                      | 2456.66 | 935.08  | 0.18                      |
| Canalets<br>38°11'11.3"N<br>00°36'49.3"W     | 13/06/12         | 26.1 | 54.16      | 0.08 | 0.06 | 7.96  | 7.81 | 0.77 | 9.41   | 28.89                     | 0.23                      | 2121.86 | 837.72  | 0.16                      |
| Calderones 2<br>38°11'12.6"N<br>00°36'49.0"W | 13/06/12         | 25.4 | 59.48      | 0.15 | 0.09 | 11.33 | 2.16 | 0.77 | 19.05  | 14.66                     | 3.94                      | 2215.22 | 1569.87 | 0.19                      |
| Museo Sal 1<br>38°11'50.1"N<br>00°34'07.4"W  | 14/06/12         | 24.9 | 81.58      | 0.22 | 0.14 | 5.24  | 4.21 | 1.31 | 51.62  | 8.19                      | 156.48                    | 1368.96 | 1421.40 | 0.49                      |
| Museo Sal 2<br>38°11'50.1"N<br>00°34'07.4"W  | 14/06/12         | 23   | 113.1<br>6 | 0.53 | 0.32 | 6.22  | 2.58 | 2.03 | 201.83 | 247.20                    | 1970.10                   | 392.70  | 1025.08 | 1.11                      |

|                                              |                  |      |            |      |      |       |       |      |       |                           |                           |         |         |                           |
|----------------------------------------------|------------------|------|------------|------|------|-------|-------|------|-------|---------------------------|---------------------------|---------|---------|---------------------------|
| Loma 1<br>38°10'08.5"N<br>00°37'26.9"W       | 14/06/12         | 25.2 | 97.3       | 0.14 | 0.12 | 15.94 | 8.64  | 1.11 | 12.23 | 6.87                      | 19.12                     | 1458.89 | 702.75  | 0.08                      |
| Loma 2<br>38°10'15.7"N<br>00°37'13.5"W       | 14/06/12         | 27.3 | 162.1<br>2 | 0.25 | 0.24 | 8.01  | 7.45  | 2.91 | 18.75 | 22.96                     | 1.54                      | 879.09  | 430.48  | 0.24                      |
| Charco Nuevo<br>38°10'13.3"N<br>00°37'40.7"W | 14/06/12         | 25.9 | 35.6       | n.d. | 0.02 | 4.13  | 0.81  | 0.45 | 4.17  | 26.93                     | 11.60                     | 2335.95 | 565.39  | 0.02                      |
| Raspa<br>38°10'13.7"N<br>00°37'40.7"W        | 14/06/12         | 26.9 | 82.24      | n.d. | 0.11 | 14.22 | 11.22 | 0.87 | 32.70 | 46.30                     | 111.81                    | 3006.80 | 1025.79 | 0.02                      |
| Real<br>38°10'24.8"N<br>00°37'46.9"W         | 14/06/12         | 25.6 | 113.5<br>4 | n.d. | 0.11 | 7.20  | n.d.  | 0.96 | 20.26 | 3.19                      | 134.72                    | 1235.89 | 860.48  | 0.02                      |
| Ebro Delta<br>(EbroD)<br>Tarragona,<br>Spain | Sampling<br>Date | Temp | Salin.     | TN   | TDN  | TP    | TDP   | DOC  | Chl a | HA<br>(x10 <sup>6</sup> ) | CA<br>(x10 <sup>3</sup> ) | BP      | ArP     | VA<br>(x10 <sup>9</sup> ) |
| 0<br>40°35'13.3"N<br>00°40'09.9"E            | 23/07/12         | 24.7 | 84.64      | n.d. | 0.33 | 3.74  | 0.81  | 1.82 | 9.7   | 26.70                     | 0.88                      | 780.22  | 1772.99 | 0.34                      |
| 1<br>40°34'30.7"N<br>00°39'34.8"E            | 23/07/12         | 23.8 | 46.62      | 0.42 | 0.32 | 2.66  | 2.20  | 0.71 | 6.49  | 15.46                     | 10.95                     | 2028.50 | 1354.13 | 0.15                      |
| 2<br>40°34'5.20"N<br>00°39'41.5"E            | 23/07/12         | 25.0 | 137.1<br>6 | n.d. | 0.24 | 3.39  | 1.97  | 1.27 | 3.54  | 2.13                      | 1.37                      | 930.59  | 1859.58 | 0.36                      |
| 3<br>40°34'29.3"N<br>00°40'20.0"E            | 23/07/12         | 28.7 | 80.7       | 0.47 | 0.34 | 7.70  | 4.51  | 1.26 | 5     | 15.07                     | 2.82                      | 1579.53 | 1752.18 | 0.26                      |
| 4-1<br>40°35'13.3"N<br>00°40'10.0"E          | 23/07/12         | 24.8 | 40.58      | 0.34 | 0.14 | n.d.  | 3.74  | 0.52 | 0.59  | 7.08                      | 0.51                      | 1787.79 | 533.72  | 0.15                      |
| 4-2<br>40°34'54.6"N                          | 23/07/12         | 29.5 | 84.74      | 0.37 | 0.24 | 5.50  | 2.12  | n.d. | 2.34  | 29.51                     | 0.82                      | 1049.38 | 1576.57 | 0.32                      |

|                                                                           |                  |      |            |      |      |       |      |      |       |                           |                           |         |         |                           |  |
|---------------------------------------------------------------------------|------------------|------|------------|------|------|-------|------|------|-------|---------------------------|---------------------------|---------|---------|---------------------------|--|
| 00°39'08.0"E                                                              |                  |      |            |      |      |       |      |      |       |                           |                           |         |         |                           |  |
| 5<br>40°34'23.7"N<br>00°40'33.5"E                                         | 23/07/12         | 30.1 | 82.78      | 0.40 | 0.33 | 7.50  | 2.35 | 2.70 | 0.62  | 95.54                     | 0.98                      | n.d.    | 1581.64 | 0.09                      |  |
| 6<br>40°34'41.3"N<br>00°41'26.2"E                                         | 23/07/12         | 32.9 | 185.6<br>8 | n.d. | 0.59 | 6.73  | 4.89 | 3.12 | 2.89  | 6.51                      | 0.40                      | 431.96  | 973.47  | 1.62                      |  |
| 9<br>40°35'07.7"N<br>00°41'56.7"E                                         | 23/07/12         | 27.7 | 289.1      | 0.60 | 0.53 | 14.42 | 3.35 | 5.59 | 2.19  | 27.80                     | 0.05                      | n.d.    | 1616.00 | 1.69                      |  |
| 10<br>40°35'07.5"N<br>00°41'56.6"E                                        | 23/07/12         | 27   | 343        | 0.66 | 0.62 | 13.96 | 4.66 | 5.76 | 3.06  | 47.09                     | 0.03                      | n.d.    | 1581.72 | 1.57                      |  |
| C1<br>40°35'02.5"N<br>00°41'59.8"E                                        | 23/07/12         | 27   | 200.1<br>2 | 0.46 | 0.40 | 7.20  | 4.66 | 2.65 | 0.39  | 83.43                     | 0.04                      | 532.63  | 925.43  | 1.54                      |  |
| C3<br>40°35'07.9"N<br>00°41'56.4"E                                        | 23/07/12         | 28.1 | 225.6      | 0.51 | 0.48 | 10.04 | 4.66 | 4.16 | 0.04  | 79.48                     | 0.02                      | 346.83  | 1726.65 | 1.38                      |  |
| C4<br>40°35'15.7"N<br>00°41'54.6"E                                        | 23/07/12         | 27.8 | 264.6<br>4 | 0.54 | 0.50 | 13.31 | 5.35 | 4.57 | 0.26  | 80.22                     | 0.01                      | 18.96   | 2289.87 | 1.21                      |  |
| Salin-de-Giraud,<br>Saintes-Maries-<br>de-la-Mer<br>(Camargue),<br>France | Sampling<br>Date | Temp | Salin.     | TN   | TDN  | TP    | TDP  | DOC  | Chl a | HA<br>(x10 <sup>6</sup> ) | CA<br>(x10 <sup>3</sup> ) | BP      | ArP     | VA<br>(x10 <sup>9</sup> ) |  |
| Enfores<br>43°26'47.7"N<br>04°37'00.2"E                                   | 26/07/11         | 19.1 | 2.48       | n.d. | 0.13 | 5.27  | 3.12 | n.d. | 21.60 | 4.40                      | 43.63                     | 1051.65 | 908.91  | n.d.                      |  |
| Galabert<br>43°27'04.0"N<br>04°35'03.0"E                                  | 26/07/11         | 20.8 | 6.58       | 0.12 | 0.11 | 7.43  | 6.49 | n.d. | 11.96 | 3.53                      | 23.02                     | 1472.41 | 310.19  | n.d.                      |  |
| Vaccares_1<br>43°32'40.0"N<br>04°37'54.2"E                                | 27/07/11         | 26.5 | 11.84      | 0.13 | 0.11 | n.d.  | 2.22 | n.d. | 25.69 | 5.69                      | 56.52                     | 1672.42 | 229.02  | n.d.                      |  |

|                                                      |                  |      |            |      |      |      |      |      |       |                           |                           |         |         |                           |
|------------------------------------------------------|------------------|------|------------|------|------|------|------|------|-------|---------------------------|---------------------------|---------|---------|---------------------------|
| Vaccares 2<br>43°33'27.4"N<br>04°29'26.5"E           | 27/07/11         | 26.9 | 16.94      | 0.19 | 0.16 | 5.09 | 4.73 | n.d. | 12.31 | 8.17                      | 4.48                      | 2142.63 | 213.83  | n.d.                      |
| Launes<br>43°28'12.0"N<br>04°24'35.0"E               | 27/07/11         | 30.3 | 6.72       | 0.11 | 0.04 | 4.92 | 3.12 | n.d. | 16.13 | 6.95                      | 257.81                    | 2304.25 | 242.15  | n.d.                      |
| Piemason<br>43°21'46.3"N<br>04°47'46.7"E             | 28/07/11         | 21.5 | 7.52       | 0.14 | 0.07 | 3.93 | 3.65 | n.d. | 7.34  | 6.47                      | 1720.68                   | 1073.26 | 120.12  | n.d.                      |
| Verdier<br>43°31'55.6"N<br>04°41'59.0"E              | 27/07/11         | 25.4 | 0.22       | 0.08 | 0.05 | 4.56 | 3.83 | n.d. | 14.54 | 3.59                      | 59.78                     | 903.87  | 257.38  | n.d.                      |
| Fangassier<br>43°26'23.9"N<br>04°36'53.4"E           | 26/07/11         | 24.3 | 194.7<br>5 | 0.39 | 0.35 | 7.43 | 4.38 | n.d. | 7.63  | 16.16                     | 3.58                      | 902.74  | 1409.63 | n.d.                      |
| P. Rascallion<br>43°24'26.4"N<br>04°39'38.5"E        | 28/07/11         | 21.8 | 54.74      | 0.10 | 0.14 | 4.74 | 4.56 | n.d. | 3.07  | 9.35                      | 11.93                     | 1182.88 | 97.19   | n.d.                      |
| G. Rascallion<br>43°25'05.6"N<br>04°37'18.3"E        | 27/07/11         | 22.2 | 49.4       | 0.13 | n.d. | 4.56 | 3.30 | n.d. | 2.08  | 9.72                      | 9.90                      | 828.7   | 55.72   | n.d.                      |
| Dame<br>43°23'09.7"N<br>04°47'30.3"E                 | 28/07/11         | 21.6 | 48.9       | 0.14 | 0.13 | n.d. | 4.74 | n.d. | 3.73  | 12.73                     | 2.65                      | 1069.27 | 105.13  | n.d.                      |
| Cincs Francs<br>43°22'33.2"N<br>04°48'08.6"E         | 28/07/11         | 22.1 | 60.65      | 0.14 | 0.06 | 4.56 | 3.30 | n.d. | 11.43 | 7.57                      | 166.92                    | 1290.54 | 287.33  | n.d.                      |
| Ursule<br>43°21'17.9"N<br>04°46'59.3"E               | 28/07/11         | 22.4 | 84.95      | 0.15 | 0.14 | 7.25 | 6.89 | n.d. | 12.27 | 19.51                     | 3.09                      | 1624.8  | 445.49  | n.d.                      |
| Quentin<br>43°21'17.7"N<br>04°46'59.3"E              | 28/07/11         | 22   | 42.34      | 0.08 | 0.07 | 6.53 | 3.62 | n.d. | 2.31  | 6.78                      | 1.29                      | 1037.35 | 74.99   | n.d.                      |
| Molentargius,<br>Santa Guilla and<br>Santa Catterine | Sampling<br>Date | Temp | Salin.     | TN   | TDN  | TP   | TDP  | DOC  | Chl a | HA<br>(x10 <sup>6</sup> ) | CA<br>(x10 <sup>3</sup> ) | BP      | ArP     | VA<br>(x10 <sup>9</sup> ) |



| (Sardinia),Italy                               |          |      |            |      |      |       |       |      |        |       |         |         |        |      |  |
|------------------------------------------------|----------|------|------------|------|------|-------|-------|------|--------|-------|---------|---------|--------|------|--|
| Bianca_S23<br>39°12'33.8"N<br>09°08'39.3"E     | 09/07/13 | 29.5 | 75.2       | ---  | 0.14 | 6.04  | 3.20  | 1.10 | 37.49  | 6.53  | 67.69   | 843.84  | 73.34  | n.d. |  |
| Bianca_S20<br>39°12'35.9"N<br>09°08'43.2"E     | 09/07/13 | 28.8 | 50.36      | 0.12 | 0.11 | 2.04  | 1.89  | 0.52 | 6.09   | 4.14  | 93.02   | 921.97  | 108.43 | n.d. |  |
| Bianca_S21<br>39°12'37.9"N<br>09°08'45.6"E     | 09/07/13 | 31.7 | 58.24      | 0.13 | 0.11 | 8.96  | 6.81  | 0.49 | 9.09   | 5.58  | 109.47  | 1131.45 | 256.86 | n.d. |  |
| Quarto_S16<br>39°13'30.8"N<br>09°11'55.9"E     | 10/07/13 | 25.4 | 99.32      | 0.19 | 0.16 | 10.66 | 7.93  | 2.24 | 76.19  | 40.82 | 294.50  | 211.84  | 354.61 | n.d. |  |
| Minore_S04<br>39°14'26.0"N<br>09°09'10.9"E     | 10/07/13 | 27.8 | 1.79       | 0.11 | 0.04 | n.d.  | 6.09  | 1.33 | 617.41 | 54.19 | 16.61   | 299.71  | 551.67 | n.d. |  |
| Maggiore_1<br>39°14'19.0"N<br>09°09'02.4"E     | 10/07/13 | 28.3 | 112.6      | 0.14 | 0.07 | 23.8  | 7.66  | 2.83 | 58.27  | 66.65 | 1055.02 | 504.18  | 546.84 | n.d. |  |
| Maggiore_2<br>39°14'14.8"N<br>09°09'23.6"E     | 10/07/13 | 28.1 | 97.56      | 0.08 | 0.05 | 26.95 | 10.39 | 2.74 | 56.56  | 58.61 | 1054.89 | 370.45  | 453.26 | n.d. |  |
| Quarto_S18<br>39°13'07.3"N<br>09°09'55.9"E     | 10/07/13 | 31.4 | 238.8<br>4 | 0.39 | 0.35 | 34.49 | 11.35 | 4.89 | 8.95   | 24.73 | 38.25   | n.d.    | 995.17 | n.d. |  |
| Culatica<br>39°13'44.3"N<br>09°12'53.2"E       | 10/07/13 | 31.1 | 154.2      | n.d. | 0.14 | 12.09 | n.d.  | 2.73 | 29.87  | 30.65 | 259.24  | 482.05  | 345.07 | n.d. |  |
| Quarto_S17<br>39°13'24.6"N<br>09°11'34.3"E     | 10/07/13 | 32.7 | 160.1<br>2 | 0.13 | n.d. | 20.57 | 8.08  | 3.14 | 6.67   | 42.66 | 29.09   | 611.26  | 351.98 | n.d. |  |
| Santa_Guilla_1<br>39°11'01.5"N<br>09°02'55.5"E | 10/07/13 | 33.8 | 83.96      | 0.14 | 0.13 | 11.27 | 4.89  | 1.09 | 28.95  | 5.43  | 18.05   | 1502.96 | 221.18 | n.d. |  |
| Capoterra<br>39°09'42.0"N                      | 10/07/13 | 31.2 | 15.64      | 0.14 | 0.06 | 6.58  | 0.81  | 0.34 | 12.78  | 7.29  | 116.52  | 2060.27 | 254.17 | n.d. |  |

|                                                |                  |      |            |      |      |       |       |      |       |                           |                           |         |        |                           |  |
|------------------------------------------------|------------------|------|------------|------|------|-------|-------|------|-------|---------------------------|---------------------------|---------|--------|---------------------------|--|
| 09°01'35.7"E                                   |                  |      |            |      |      |       |       |      |       |                           |                           |         |        |                           |  |
| Santa Guilla_2<br>39°10'20.2"N<br>09°01'49.9"E | 10/07/13         | 33   | 51.68      | 0.15 | 0.14 | 4.2   | 0.85  | 0.89 | 12.03 | 8.56                      | 61.07                     | 1219.99 | 317.84 | n.d.                      |  |
| Thyna, Sfax<br>(Tunisia)                       | Sampling<br>Date | Temp | Salin.     | TN   | TDN  | TP    | TDP   | DOC  | Chl a | HA<br>(x10 <sup>6</sup> ) | CA<br>(x10 <sup>6</sup> ) | BP      | ArP    | VA<br>(x10 <sup>9</sup> ) |  |
| Tyna<br>34°38'16.3"N<br>10°40'05.6"E           | 12/06/13         | 24.5 | 40.56      | 0.05 | 0.05 | 45.76 | 40.94 | 0.41 | 1.89  | 4.51                      | 2.43                      | 1145.99 | 211.76 | n.d.                      |  |
| AVP_11<br>34°38'43.1"N<br>10°42'51.9"E         | 12/06/13         | 25.6 | 54.2       | 0.20 | 0.10 | 7.58  | 2.67  | 0.83 | 37.42 | 26.29                     | 9882.82                   | 740.2   | 455.90 | n.d.                      |  |
| PE_C1_1<br>34°38'14.5"N<br>10°40'07.9"E        | 12/06/13         | 25.9 | 95.48      | 0.34 | 0.20 | 18.11 | 6.59  | 1.99 | 57.89 | 49.09                     | 4202.70                   | 806.08  | 459.60 | n.d.                      |  |
| AVP_15<br>34°38'24.4"N<br>10°41'0.89"E         | 12/06/13         | 26.6 | 62.76      | 0.37 | 0.14 | 17.42 | 3.14  | 1.19 | 84.85 | 35.21                     | 38105.50                  | 632.76  | 554.42 | n.d.                      |  |
| PE_C3<br>34°38'43.0"N<br>10°42'51.6"E          | 12/06/13         | 28.3 | 134.1<br>6 | 0.66 | 0.25 | 24.72 | 5.57  | 2.60 | 66.16 | 85.83                     | 3550.32                   | 212.1   | 376.68 | n.d.                      |  |
| AVP_4<br>34°40'47.9"N<br>10°44'43.8"E          | 12/06/13         | 28   | 47         | 0.12 | 0.09 | n.d.  | 13.96 | 0.66 | 2.35  | 6.15                      | 0.29                      | 690.84  | 300.06 | n.d.                      |  |
| AVP_17<br>34°40'50.6"N<br>10°44'36.1"E         | 12/06/13         | 27.5 | 70.84      | 0.44 | 0.15 | 23.49 | 6.83  | 1.51 | 94.58 | 55.24                     | 37281.13                  | 238.58  | 280.31 | n.d.                      |  |
| PE_C2<br>34°40'49.9"N<br>10°44'44.0"E          | 12/06/13         | 28.8 | 134.1<br>2 | 0.51 | 0.24 | 14.65 | 5.30  | 2.16 | 34.52 | 68.48                     | 4187.92                   | 91.26   | 493.02 | n.d.                      |  |
| PE_C5_F<br>34°40'53.2"N<br>10°44'36.6"E        | 12/06/13         | 29.6 | 138.6      | 0.63 | 0.28 | n.d.  | n.d.  | 2.37 | 59.87 | 0.00                      | 0.00                      | 219.01  | 426.46 | n.d.                      |  |
| PE_C5_B<br>34°38'30.8"N                        | 12/06/13         | 29.8 | 94.08      | 0.59 | 0.22 | n.d.  | n.d.  | 1.85 | n.d.  | 45.13                     | 6074.59                   | 209.07  | 362.04 | n.d.                      |  |



**Table S2.** List of the best models ( $\Delta AIC < 2$ ) of GLM analysis for heterotrophic prokaryotic abundance, cyanobacteria abundance, heterotrophic bacterial production and heterotrophic archaeal production. The models included as continuous predictors: Salinity, Total Dissolved Nitrogen (TDN) and Total dissolved phosphorus (TDP) and as wetland site as categorical variable. The symbols + and – denotes the positive or negative effects, respectively.

| Dependent Variable                  | Pred. Var. 1 | Pred. Var. 2 | Pred Var. 3 | Pred Var. 4 | Degrees Freedom | AIC      | L.Ratio Chi <sup>2</sup> | p-values |
|-------------------------------------|--------------|--------------|-------------|-------------|-----------------|----------|--------------------------|----------|
| Heterotrophic Prokaryotic Abundance | (+) TDN      | Site         | ---         | ---         | 8               | 106.3354 | 41.96024                 | 0.000001 |
|                                     | (+) TDN      | (-)TDP       | Site        | ---         | 9               | 107.7155 | 42.58012                 | 0.000003 |
|                                     | (+) Salinity | (+) TDN      | Site        | ---         | 9               | 108.2298 | 42.06589                 | 0.000003 |
| Cyanobacteria Abundance             | (+)TDN       | (-)TDP       | Site        | ---         | 9               | 278.0048 | 90.12917                 | 0.000000 |
| Heterotrophic Bacterial Production  | (-) TDN      | Site         | ---         | ---         | 9               | 691.0962 | 89.88757                 | 0.000000 |
|                                     | (-) TDN      | (-) TDP      | Site        | ---         | 10              | 693.0527 | 89.93105                 | 0.000000 |
|                                     | (-) Salinity | (-) TDN      | Site        | ---         | 10              | 693.0688 | 89.91494                 | 0.000000 |
| Heterotrophic Archaeal Production   | (+)TDN       | Site         | ---         | ---         | 9               | -12.1555 | 102.1138                 | 0.000000 |
|                                     | (-) Salinity | (+) TDN      | Site        | ---         | 10              | -11.7585 | 103.7169                 | 0.000000 |
|                                     | (+) TDN      | (-) TDP      | Site        | ---         | 10              | -11.3435 | 103.3019                 | 0.000000 |
|                                     | (-) Salinity | (+) TDN      | (-) TDP     | Site        | 11              | -10.8216 | 104.7800                 | 0.000000 |

**Table S3.** List of the best models ( $\Delta AIC < 2$ ) of GLM analysis for heterotrophic prokaryotic abundance, cyanobacteria abundance, heterotrophic bacterial production and heterotrophic archaeal production. The models included as continuous variables: Salinity, Total Dissolved Nitrogen (TDN), Total Dissolved phosphorus (TDP), and Dissolved Organic Carbon (DOC) and as categorical variable: Site. The symbols + and – denotes the positive or negative effects, respectively. Since DOC data were not available for Camargue this site was removed in this analysis.

| Dependent Variable                  | Pred. Var. 1 | Pred. Var. 2 | Pred Var. 3 | Pred Var. 4 | Deg. Freed | AIC      | L.Ratio  | p-values |
|-------------------------------------|--------------|--------------|-------------|-------------|------------|----------|----------|----------|
| Heterotrophic Prokaryotic Abundance | (-) Salinity | (+) DOC      | ---         | ---         | 2          | 89.1651  | 29.49407 | 0.000000 |
|                                     | (-) Salinity | (-) TDP      | (+) DOC     | ---         | 3          | 89.9604  | 30.69872 | 0.000001 |
|                                     | (+) DOC      | ---          | ---         | ---         | 1          | 91.0347  | 25.62444 | 0.000000 |
|                                     | (-) Salinity | (+) TDN      | (+) DOC     | ---         | 3          | 91.1576  | 29.5015  | 0.000002 |
| Cyanobacteria Abundance             | (+) TDN      | (-) TDP      | Site        | ---         | 9          | 248.2544 | 84.96543 | 0.000000 |
|                                     | (-) TDP      | (+) DOC      | Site        | ---         | 9          | 249.6883 | 83.53152 | 0.000000 |
|                                     | (+) Salinity | (+) TDN      | (-) TDP     | Site        | 10         | 249.8648 | 85.35494 | 0.000000 |
|                                     | (+) TDN      | (-) TDP      | (+) DOC     | Site        | 10         | 249.9678 | 85.25201 | 0.000000 |
| Heterotrophic Bacterial Production  | (-) DOC      | Site         | ---         | ---         | 8          | 569.437  | 100.126  | 0.000000 |
|                                     | (+) Salinit  | (-) DOC      | Site        | ---         | 9          | 570.5377 | 101.0253 | 0.000000 |
|                                     | (+) TDP      | (-) DOC      | Site        | ---         | 9          | 571.1877 | 100.3753 | 0.000000 |
|                                     | (+) TDN      | (-) DOC      | Site        | ---         | 9          | 571.337  | 100.226  | 0.000000 |
| Heterotrophic Archaeal Production   | (+) TDN      | Site         | ---         | ---         | 8          | -28.7444 | 83.45753 | 0.000000 |
|                                     | (+) TDN      | (-) TDP      | Site        | ---         | 9          | -27.4973 | 84.21043 | 0.000000 |
|                                     | (-) Salinity | (+) TDN      | Site        | ---         | 9          | -27.1726 | 83.88567 | 0.000000 |
|                                     | (+) TDN      | (-) DOC      | Site        | ---         | 9          | -26.7457 | 83.45884 | 0.000000 |

**Table S4.** List of the best models ( $\Delta AIC < 2$ ) of GLM analysis for virus abundance. The models included as continuous predictors: Salinity, heterotrophic prokaryotic abundance (HPA) and cyanobacteria abundance (CyA) and as categorical variable: Site. The symbols + and – denotes the positive or negative effects on virus abundances.

| Depen.<br>Var.     | Pred.<br>Var. 1 | Pred.<br>Var. 2 | Pred<br>Var. 3 | Pred<br>Var. 4 | Degrees<br>Freedom | AIC      | L.Ratio  | p-values |
|--------------------|-----------------|-----------------|----------------|----------------|--------------------|----------|----------|----------|
| Virus<br>abundance | (+) Salinity    | (+) HPA         | Site           |                | 6                  | 29.68761 | 72.61037 | 0.000000 |
|                    | (+) Salinity    | (-) CyA         | (+) HPA        | Site           | 7                  | 31.25900 | 73.03898 | 0.000000 |

**Table S5.** List of the best models ( $\Delta AIC < 2$ ) of GLM analysis for bacterial and archaea production. The models included as continuous variables: Salinity, Virus abundance (VA), Total dissolved nitrogen (TDN) and as categorical variable: Site. The symbols + and – denotes the positive or negative effects, respectively.

| Depen. Var.                        | Pred. Var. 1 | Pred. Var. 2 | Pred Var. 3 | Pred Var. 4 | Degrees Freedom | AIC      | L.Ratio  | p-values |
|------------------------------------|--------------|--------------|-------------|-------------|-----------------|----------|----------|----------|
| Heterotrophic bacterial production | (-) Salinity | (-) VA       | Site        |             | 7               | 459.9913 | 77.67171 | 0.000000 |
|                                    | (-) Salinity | (-)TDN       | (-)VA       | Site        | 8               | 461.9466 | 77.71634 | 0.000000 |
| Heterotrophic archaeal production  | (+) TDN      | Site         |             |             | 6               | -29.8003 | 37.05512 | 0.000002 |
|                                    | (+) Salinity | TDN          | Site        |             | 7               | -27.8334 | 37.08825 | 0.000005 |
